# Supplementary material for: Multifaceted Analyses of Isolated Mitochondria Establish the Anticancer Drug 2-Hydroxyoleic Acid as an Inhibitor of Substrate Oxidation and an Activator of Complex IV-Dependent State 3 Respiration
Source: MDPI journal article supplement (doi:10.3390/cells11030578), 2022-02-07
Supplement: s1 [file s1]

**Table S2: Monitored transitions in LC-MS/MS negative mode of DMH and the IS.**

| Compounds             | Molecular ion<br>[M-2H] <sup>2-</sup> /2 (m/z) | Fragment (m/z)   | DP<br>(volts) | CE<br>(volts) | CXP<br>(volts) |
|-----------------------|------------------------------------------------|------------------|---------------|---------------|----------------|
| Dimethylheptanoyl-CoA | 452.6                                          | 408 (quantifier) | -120          | -30           | -15            |
|                       | 452.6                                          | 134 (qualifier)  | -120          | -34           | -3             |
| 21:0 Coenzyme A       | 538.8                                          | 408 (quantifier) | -105          | -34           | -19            |
|                       | 538.8                                          | 134 (qualifier)  | -105          | -36           | -7             |
