# Supplementary material for: Multifaceted Analyses of Isolated Mitochondria Establish the Anticancer Drug 2-Hydroxyoleic Acid as an Inhibitor of Substrate Oxidation and an Activator of Complex IV-Dependent State 3 Respiration
Source: Cells. 2022 Feb 7;11(3):578. doi: 10.3390/cells11030578 (PMC8834245; doi:10.3390/cells11030578)
Supplement: Supplementary file 1 [file cells-11-00578-s001.zip › TableS1.xlsx]

## Sheet: Mito contr vs 2OHOA
Table S1. Lipidomic dataset for mitochondrial lipid compositional data (mol% of membrane lipids)
	Control		2OHOA		p value
Lipid species	mean	SEM	mean	SEM
PC(28:0)	0.00131503	0.00131503	0.00545171	0.00409049	0.358369
PC(30:1)	0.094276	0.0266513	0.213402	0.02383	0.00759128
PC(30:0)	0.241714	0.0418119	0.340065	0.049412	0.159616
PC(32:2)	0.198795	0.0261716	0.344361	0.0253016	0.0025232
PC(32:1)	2.07023	0.129115	1.77002	0.147282	0.156335
PC(32:0)	0.6919	0.0615115	1.39809	0.156646	0.00183962
PC(34:5)	0	0	0.0087553	0.00565106	0.152347
PC(34:4)	0.048029	0.0237668	0.106849	0.0304746	0.158982
PC(34:3)	0.103989	0.029181	0.157071	0.0128375	0.12687
PC(34:2)	2.2224	0.144159	2.05099	0.145934	0.422893
PC(34:1)	10.1536	0.367	6.18427	0.644412	0.000322485
PC(34:0)	0.0629928	0.0300141	0.720437	0.0550714	1.03051e-06
PC(36:6)	0	0	0.0130954	0.00605173	0.0557399
PC(36:5)	0.112092	0.0499681	0.12997	0.0247243	0.755054
PC(36:4)	0.741771	0.311869	0.430559	0.0720348	0.353835
PC(36:3)	0.869307	0.151891	0.492838	0.0258214	0.0346418
PC(36:2)	4.84323	0.133756	2.55953	0.294791	3.47938e-05
PC(36:1)	2.47079	0.121942	1.63865	0.0677582	0.000138421
PC(38:7)	0.0127236	0.0127236	0.00595701	0.00270013	0.614226
PC(38:6)	0.139819	0.0343534	0.213545	0.0140706	0.0751226
PC(38:5)	0.34916	0.0634716	0.259295	0.0226228	0.211898
PC(38:4)	0.313707	0.0297825	0.255657	0.0141602	0.108851
PC(38:3)	0.302529	0.0272049	0.200508	0.0145988	0.00795458
PC(38:2)	0.26792	0.0338568	0.123604	0.0121961	0.00247688
PC(38:1)	0.00632469	0.00632469	0.0118691	0.00582665	0.533611
PC(40:7)	0.103568	0.0392501	0.111163	0.0308274	0.882084
PC(40:6)	0.0558053	0.0251996	0.0823642	0.0196203	0.425046
PC(40:5)	0.0218168	0.0149692	0.0517205	0.0177982	0.227476
PC(40:4)	0.0111765	0.0111765	0.0164705	0.00761289	0.703656
PC(40:3)	0.00806802	0.00806802	0.00927189	0.00443476	0.898556
PC(40:2)	0.00246161	0.00246161	0.00112438	0.00112438	0.63189
PC	26.5215	1.20503	19.907	1.10034	0.00231067
PC(OH)1(32:2)	0	0	0.203672	0.0372939	0.000276434
PC(OH)1(32:1)	0	0	0.235404	0.0446491	0.000361615
PC(OH)1(34:2)	0.00221729	0.00221729	0.556541	0.0463174	3.02823e-07
PC(OH)1(34:1)	0	0	4.96424	0.256051	2.90781e-09
PC(OH)1(36:3)	0	0	0.127924	0.0291459	0.00135799
PC(OH)1(36:2)	0	0	2.45712	0.175097	6.62208e-08
PC(OH)1(36:1)	0	0	0.926575	0.100033	3.19246e-06
PC(OH)1(38:5)	0	0	0.181936	0.0362602	0.000523661
PC(OH)1(38:4)	0	0	0.0581362	0.01456	0.00254746
PC(OH)1(38:3)	0	0	0.0515947	0.017426	0.0142687
PC(OH)1(38:2)	0	0	0.057514	0.0166858	0.00625886
PC(OH)1(40:7)	0	0	0.26447	0.0578193	0.00101987
PC(OH)2(36:2)	0	0	0.638039	0.0956581	5.56869e-05
PC(OH)	0.00221729	0.00221729	10.7232	0.797725	1.00004e-07
PC(31:1)	0.0429744	0.0291208	0.373748	0.0316238	1.65361e-05
PC(33:2)	0.0705824	0.0303677	0.724789	0.0404518	1.4398e-07
PC(33:1)	0.518715	0.0253323	5.10076	0.340621	1.01746e-07
PC(35:2)	0.217988	0.0247255	3.28331	0.324517	2.74497e-06
PC(35:1)	0.325514	0.0389834	0.858196	0.0883559	0.00025605
PC(17:1)	1.17577	0.129343	10.3408	0.742183	2.56827e-07
PC-O(30:0)	0.0313539	0.0207338	0.0115217	0.00518932	0.375315
PC-O(32:2)	0.0926955	0.0274255	0.0591901	0.0159381	0.315692
PC-O(32:1)	0.572752	0.0601858	0.244726	0.029485	0.000628286
PC-O(32:0)	0.413222	0.0610212	0.188001	0.0168526	0.00520134
PC-O(34:5)	0.00339384	0.00339384	0	0	0.340893
PC-O(34:4)	0.00629401	0.00629401	0.00190486	0.00190486	0.519587
PC-O(34:3)	0.0594075	0.0248517	0.0532248	0.0166862	0.840509
PC-O(34:2)	1.0511	0.139415	0.627924	0.116335	0.0420092
PC-O(34:1)	3.31546	0.175102	1.24563	0.144687	3.70079e-06
PC-O(34:0)	0.179684	0.0281288	0.072054	0.00597397	0.00382848
PC-O(36:6)	0.00371867	0.00371867	0.00242282	0.00192064	0.76321
PC-O(36:5)	0.0299875	0.0191642	0.0264796	0.0176878	0.89567
PC-O(36:4)	0.228316	0.0590568	0.110737	0.0227457	0.092834
PC-O(36:3)	0.532603	0.0988172	0.267556	0.0485764	0.0368668
PC-O(36:2)	1.78099	0.232179	0.640614	0.105734	0.00119757
PC-O(36:1)	0.757693	0.0746749	0.272038	0.0379906	0.000173768
PC-O(38:6)	0.0737262	0.0336613	0.0504051	0.013616	0.535149
PC-O(38:5)	0.185567	0.0541218	0.0835687	0.0161002	0.100997
PC-O(38:4)	0.219104	0.0588221	0.0957255	0.0180524	0.0727576
PC-O(38:3)	0.105339	0.0387032	0.0333855	0.0104836	0.102981
PC-O(38:2)	0.0423624	0.0200969	0.00763249	0.00527608	0.125578
PC-O(38:1)	0.0112065	0.00852912	0.00272759	0.0017919	0.353562
PC-O	9.69597	1.00673	4.09747	0.506857	0.000564112
LPC(16:0)	1.48411	0.39616	0.64889	0.231895	0.0988604
LPC(18:1)	0.682118	0.162567	0.274185	0.0835376	0.049683
LPC(18:0)	1.26662	0.334481	0.500363	0.183714	0.0724233
LPC	3.43284	0.889887	1.42344	0.498992	0.0772039
LPCOH(18:1)	0	0	0.0724615	0.0243107	0.0137925
LPC(OH)	0	0	0.0724615	0.0243107	0.0137925
LPC(17:1)	0	0	0.0235629	0.00593938	0.00265522
LPC(17:1)	0	0	0.0235629	0.00593938	0.00265522
PE(32:1)	0.175222	0.0350191	0.302995	0.0368414	0.030714
PE(32:0)	0.0716219	0.015262	0.336756	0.0906905	0.0163024
PE(34:2)	0.326227	0.041597	0.220502	0.033752	0.0766771
PE(34:1)	1.27296	0.0540306	3.06654	0.264495	5.75266e-05
PE(34:0)	0.083681	0.00950864	0.502717	0.0713029	0.00016712
PE(36:4)	0.100137	0.0514113	0.0799417	0.0174504	0.71767
PE(36:3)	0.267556	0.0288632	0.226303	0.0134779	0.22441
PE(36:2)	2.81302	0.190121	1.88906	0.102255	0.00161117
PE(36:1)	3.56651	0.147305	5.54563	0.543667	0.00559763
PE(38:6)	0.10075	0.0188099	0.178433	0.0245024	0.0306589
PE(38:5)	0.334805	0.0446349	0.384526	0.057068	0.508141
PE(38:4)	0.821041	0.0839157	1.12576	0.146989	0.101996
PE(38:3)	0.770041	0.0474544	0.844405	0.0664395	0.383825
PE(38:2)	0.407811	0.0147981	0.326027	0.0283759	0.0285926
PE(38:1)	0.123749	0.0145491	0.0923653	0.00341809	0.0620854
PE(40:7)	0.14984	0.0301258	0.168582	0.025607	0.645673
PE(40:6)	0.566656	0.109548	1.11737	0.221028	0.0496376
PE(40:5)	0.420077	0.0544844	0.961339	0.157318	0.00870419
PE(40:4)	0.229402	0.0288921	0.427745	0.108605	0.108044
PE(40:3)	0.143495	0.0191165	0.179811	0.0291701	0.32226
PE(40:2)	0.0673329	0.00540395	0.0301824	0.00339415	0.000167945
PE(40:1)	0.00865437	0.00582626	0.00388422	0.00178286	0.451829
PE	12.8206	0.678969	18.0109	1.21803	0.00396217
PE(OH)1(34:2)	0.000698366	0.000698366	0.0168461	0.00744639	0.0561991
PE(OH)1(34:1)	0.00418702	0.00271246	1.23075	0.218892	0.000226714
PE(OH)1(36:3)	0.0012894	0.0012894	0.0464304	0.0123752	0.00462732
PE(OH)1(36:2)	0.01213	0.00836557	1.23411	0.181594	5.21961e-05
PE(OH)1(36:1)	0.0371666	0.0132841	1.85266	0.269616	5.19756e-05
PE(OH)1(40:7)	0	0	0.188156	0.050208	0.00379914
PE(OH)1(40:6)	0.00113506	0.00113506	0.31462	0.0713213	0.00134588
PE(OH)2(36:2)	0	0	0.419505	0.113294	0.0040896
PE(OH)	0.0566064	0.0265833	5.30309	0.857331	0.000113186
PE(33:1)	0.150642	0.0741729	0.553356	0.0239106	0.000420604
PE(35:2)	0.0573755	0.0191486	0.636075	0.0618296	4.39162e-06
PE(35:1)	0.196198	0.00752239	1.22335	0.0850913	2.86649e-07
PE(17:1)	0.404216	0.0931231	2.41278	0.124769	1.47457e-07
LPE(16:0)	0.0360916	0.00502438	0.0407569	0.00230065	0.418281
LPE(18:2)	0.086004	0.0228108	0.0316603	0.0115098	0.0593258
LPE(18:1)	0.251598	0.0283152	0.110306	0.00733742	0.000691345
LPE(18:0)	0.344454	0.0470489	0.237353	0.0271382	0.0769048
LPE(20:4)	0.0451721	0.00285721	0.0201507	0.00506951	0.00156198
LPE(20:3)	0.0350107	0.00774215	0.00908013	0.00225771	0.0092478
LPE(22:6)	0.00692043	0.00534868	0.00659374	0.00423909	0.962764
LPE(22:5)	0.00819641	0.00425374	0.00720827	0.00324367	0.85714
LPE(22:4)	0.00878118	0.00412859	0.00582379	0.00290831	0.571117
LPE	0.822229	0.0734706	0.468932	0.044541	0.00210369
LPE_Pl[16:0)	0.236739	0.0345689	0.0660283	0.0115864	0.000864527
LPE_Pl[18:1)	0.133817	0.0235449	0.0229154	0.0026996	0.0008681
LPE_Pl[18:0)	0.239734	0.0442927	0.0602689	0.0134755	0.00307705
LPE-P	0.61029	0.0985303	0.149213	0.0264343	0.00110884
LPEOH(18:1)	0	0	0.0478746	0.00941579	0.000474653
LPE(OH)	0	0	0.0478746	0.00941579	0.000474653
PE-P(32:1)	0.195817	0.0197612	0.0532687	0.00571263	4.04514e-05
PE-P(32:0)	0.0683904	0.0133068	0.0305286	0.00530833	0.0246163
PE-P(34:2)	0.423954	0.0370756	0.12305	0.0155295	2.09675e-05
PE-P(34:1)	2.95201	0.263167	0.81803	0.0850965	1.61464e-05
PE-P(34:0)	0.216535	0.022163	0.0784179	0.00678607	0.000139584
PE-P(36:4)	1.24522	0.0849022	0.607547	0.0342917	3.8804e-05
PE-P(36:3)	1.38757	0.12891	0.443782	0.0571791	5.4149e-05
PE-P(36:2)	1.88375	0.19212	0.564479	0.0657508	6.92193e-05
PE-P(36:1)	1.817	0.137209	0.601181	0.0642464	1.14582e-05
PE-P(36:0)	0.0928582	0.00569539	0.0336601	0.00407456	7.2418e-06
PE-P(38:6)	0.769121	0.0560498	0.432753	0.0443137	0.000831862
PE-P(38:5)	1.6306	0.138585	0.722552	0.0551571	0.000117571
PE-P(38:4)	2.10907	0.199659	0.844902	0.0549989	0.000115041
PE-P(38:2)	0.455016	0.0329977	0.137952	0.0176759	7.11715e-06
PE-P(38:1)	0.273963	0.0161519	0.0871689	0.00830097	1.22685e-06
PE-P(38:0)	0.0230233	0.00829381	0.00388409	0.00247779	0.0514656
PE-P(40:7)	0.289485	0.0217702	0.186758	0.0149204	0.00299841
PE-P(40:6)	0.108488	0.0689724	0.127089	0.0693843	0.853012
PE-P(40:5)	0.607412	0.0374031	0.265471	0.0211304	1.23074e-05
PE-P(40:4)	0.466195	0.0528941	0.162863	0.0267676	0.000452792
PE-P(40:3)	0.336418	0.0351936	0.103902	0.023871	0.00027395
PE-P(40:2)	0.137063	0.0183534	0.0326753	0.00617976	0.000305583
PE-P(40:1)	0.0440595	0.0116363	0.00753477	0.00387734	0.0138574
PE-P	17.533	1.16763	6.46945	0.443478	4.7739e-06
PI(34:3)	0.000972974	0.000972974	0.00337183	0.00217607	0.33797
PI(34:2)	0.228655	0.110201	0.140792	0.00621528	0.444502
PI(34:1)	0.165106	0.0393339	0.144416	0.0150041	0.633703
PI(36:4)	0.119378	0.0220841	0.0302641	0.00377927	0.00261203
PI(36:3)	0.420127	0.0233753	0.108778	0.013895	4.53796e-07
PI(36:2)	1.09911	0.125406	0.718739	0.117676	0.0514006
PI(36:1)	0.203806	0.0289123	0.473316	0.0388834	0.000240007
PI(38:6)	0.0170175	0.00572993	0.00946049	0.00462136	0.328808
PI(38:5)	0.583019	0.0188626	0.247	0.0424924	2.83222e-05
PI(38:4)	2.70004	0.0895737	1.45252	0.214678	0.000317657
PI(38:3)	3.16152	0.15919	1.26152	0.130934	3.33527e-06
PI(38:2)	0.30797	0.0369861	0.307714	0.0510912	0.996834
PI(40:7)	0.0132585	0.00500152	0.00491612	0.00250067	0.166588
PI(40:6)	0.0790895	0.00501146	0.0664792	0.00781365	0.204166
PI(40:5)	0.11747	0.00401092	0.0811697	0.00999368	0.00710981
PI(40:4)	0.151095	0.0104834	0.0700908	0.0102234	0.000250355
PI(40:3)	0.127635	0.0142023	0.0733621	0.00873561	0.00864757
PI	9.49527	0.321934	5.1939	0.518635	3.51353e-05
PI(OH)1(34:2)	0	0	0.00260116	0.00172171	0.161774
PI(OH)1(34:1)	0	0	0.0159293	0.00552827	0.0163456
PI(OH)1(36:3)	0	0	0.0018398	0.0011766	0.148964
PI(OH)1(36:2)	0	0	0.0971712	0.00582325	1.25065e-08
PI(OH)1(36:1)	0	0	0.0274738	0.00631843	0.00144764
PI(OH)1(38:5)	0	0	0.0111689	0.00359467	0.0111159
PI(OH)1(38:4)	0	0	0.016565	0.00527312	0.010485
PI(OH)1(38:3)	0	0	0.0131505	0.00380885	0.00619905
PI(OH)1(38:2)	0	0	0.000918931	0.000904127	0.333411
PI(OH)2(36:2)	0	0	0.00101667	0.000643127	0.145001
PI(OH)	0	0	0.187835	0.0266754	3.53454e-05
PI(33:1)	0	0	0.0325251	0.00910527	0.00507781
PI(35:2)	0.0098522	0.00478094	0.499475	0.0749584	6.7342e-05
PI(35:1)	0.00602185	0.00273106	0.150598	0.0242204	0.00014477
PI(17:1)	0.0158741	0.0074593	0.682598	0.0671671	1.79902e-06
LPI(16:0)	0.00161037	0.00161037	0.000234024	0.000234024	0.417447
LPI(18:2)	0.00032708	0.00032708	0	0	0.340893
LPI(18:1)	0.0963832	0.0103645	0.0367624	0.00733767	0.000848087
LPI(18:0)	0.309116	0.0382673	0.101897	0.0138567	0.000469816
LPI(20:4)	0.00273517	0.00205154	0.00133886	0.00133886	0.581271
LPI(20:3)	0.0961266	0.00847855	0.0203478	0.00585117	2.43646e-05
LPI	0.506298	0.0476756	0.16058	0.0228063	6.54248e-05
PSxPS					#DIV/0!
PS(32:1)	0.00051994	0.00051994	0.0163523	0.00891915	0.106789
PS(32:0)	0.00176491	0.00176491	0.769961	0.201156	0.00338037
PS(34:2)	0.00463901	0.00313968	0.0112789	0.00380887	0.208278
PS(34:1)	0.164599	0.0257824	0.108381	0.038214	0.250621
PS(34:0)	0	0	0.0428955	0.0214065	0.0729187
PS(36:3)	0.00136938	0.00136938	0	0	0.340893
PS(36:2)	0.39522	0.0497491	0.0985163	0.0316557	0.000512823
PS(36:1)	1.98926	0.271701	0.874478	0.16256	0.00553008
PS(38:4)	0.0167424	0.00767247	0.0596743	0.0176045	0.0493715
PS(38:3)	0.0495848	0.0123227	-2.47498e-06	1.34157e-06	0.00242255
PS(38:2)	0.142126	0.0360161	0.0524528	0.0201386	0.0548769
PS(38:1)	0.080934	0.0224329	0.357096	0.121829	0.0499004
PS(38:0)	0.161805	0.0326793	0.335342	0.122167	0.19998
PS(40:6)	0.0873977	0.0342932	0.0161755	0.0109758	0.0761232
PS(40:5)	0.0802606	0.0258424	0.0474188	0.0198675	0.337442
PS(40:4)	0.0592048	0.0207774	-1.97227e-06	1.23819e-06	0.0172626
PS(40:3)	0.0566741	0.0194929	-1.78141e-06	1.11837e-06	0.015631
PS(40:2)	0.06001	0.0164889	0.021063	0.0109485	0.0774356
PS(40:1)	0.0958816	0.0224509	0.0799138	0.0345072	0.706239
PS(40:0)	0.0224528	0.0129376	0.0308483	0.0233205	0.759378
PS(42:3)	0.00159999	0.00159999	0.00381491	0.00381491	0.604066
PS(42:2)	0.0126435	0.00565815	0	0	0.0494575
PS(42:1)	0.0127769	0.00623659	0.00703626	0.00583379	0.51667
PS	3.49747	0.537647	2.93269	0.408552	0.422479
PS(OH)1(34:1)	0	0	0.0137842	0.00213106	7.17943e-05
PS(OH)1(36:2)	0	0	0.0231103	0.00702877	0.00817827
PS(OH)1(36:1)	0	0	0.0673021	0.0121042	0.000240647
PS(OH)	0	0	0.104197	0.0186089	0.000227918
PS(33:1)	0	0	0.00771396	0.00363076	0.0595593
PS(35:2)	0	0	0.00815268	0.00434198	0.0898717
PS(35:1)	0	0	0.580145	0.144362	0.00244359
PS(17:1)	0	0	0.596012	0.138344	0.00154145
LPS(18:1)	0.0119118	0.00318292	0.00612792	0.00196869	0.153274
LPS(18:0)	0.00959529	0.00459809	0.00177114	0.0011754	0.130247
LPS(22:0)	0.0346869	0.0137659	0.0306651	0.0129112	0.835535
LPS	0.056194	0.0160702	0.0385642	0.0107335	0.383089
PG(32:2)	0.00898311	0.00298691	0.00365892	0.00188972	0.162895
PG(32:1)	0.0593049	0.0073611	0.0177402	0.0113601	0.0118296
PG(34:3)	0.0489983	0.00810202	0.0102672	0.00243382	0.00101324
PG(34:2)	0.352197	0.0160319	0.172644	0.0214588	5.34328e-05
PG(34:1)	0.575407	0.0255404	0.418765	0.0193352	0.000632544
PG(36:5)	0.00303689	0.00172118	0.000403491	0.000403491	0.167173
PG(36:4)	0.0497897	0.00244915	0.00813044	0.0019968	1.20073e-07
PG(36:3)	0.430292	0.0452579	0.0943083	0.0146012	3.43557e-05
PG(36:2)	2.58031	0.194601	0.800659	0.127265	1.73118e-05
PG(36:1)	0.333028	0.0155504	0.17951	0.0115561	1.28022e-05
PG(38:7)	0.0102376	0.00514176	0.000570362	0.000570362	0.0912063
PG(38:6)	0.0423462	0.00677557	0.0108157	0.0025984	0.00145494
PG(38:5)	0.103024	0.0195105	0.0297613	0.00758793	0.00572963
PG(38:4)	0.213142	0.0280347	0.0485158	0.0113907	0.000284715
PG(38:3)	0.434868	0.0463268	0.0990932	0.0187898	5.25558e-05
PG(38:2)	0.211788	0.0143305	0.0710963	0.00989103	1.07921e-05
PG(40:8)	0.0273079	0.00640614	0.00117614	0.000919061	0.00236948
PG(40:7)	0.41781	0.0389336	0.102736	0.0162001	2.13127e-05
PG(40:6)	0.106857	0.0137826	0.0244487	0.00562326	0.000248886
PG(40:5)	0.0497273	0.0109372	-3.28643e-07	9.76823e-08	0.00106375
PG(40:4)	0.0367376	0.00813168	0.00944235	0.00304511	0.0104483
PG(40:3)	0.0113007	0.00348715	0.00167441	0.000610324	0.021591
PG(42:10)	0.00477685	0.00244845	0.000645472	0.000645472	0.133815
PG(42:9)	0.00984152	0.0039025	0.00145194	0.000919593	0.062866
PG(42:8)	0.0292161	0.00683928	0.00421701	0.00148707	0.00508078
PG(42:7)	0.0106862	0.00391202	0	0	0.0211346
PG(44:12)	0.0173946	0.00677513	0.00103746	0.00085358	0.0376129
PG(44:11)	0.00276831	0.00146952	0.000111112	0.000111112	0.101545
PG	6.18118	0.501459	2.11288	0.250222	2.72834e-05
PG(OH)1(34:2)	0.000306656	0.000306656	0.0164843	0.0019873	1.12061e-05
PG(OH)1(34:1)	0.00133521	0.000684032	0.0298897	0.0032965	7.03278e-06
PG(OH)1(36:2)	0.0135566	0.00748727	0.222459	0.0287917	3.618e-05
PG(OH)1(36:1)	0.00139525	0.0010775	0.0126118	0.0033981	0.0103958
PG(OH)1(38:2)	0.000382733	0.000257111	0.00422627	0.00143095	0.0245787
PG(OH)1(40:7)	0.000532534	0.000532534	0.0102919	0.00377281	0.0283067
PG(OH)2(36:2)	0.000905998	0.000905998	0.0259661	0.00716243	0.00600932
PG(OH)	0.018415	0.00742118	0.321929	0.0444918	5.17596e-05
PG(33:2)	0.00453786	0.00147987	0.0225367	0.00418828	0.00231638
PG(33:1)	0.0264772	0.0122827	0.0521792	0.0111538	0.152393
PG(35:2)	0.1181	0.0310589	0.44467	0.0475435	0.000185034
PG(35:1)	0.054874	0.0119984	0.0568553	0.00658701	0.887783
PG(17:1)	0.203989	0.0462603	0.576241	0.0568041	0.00047682
LPG(16:0)	0.000665875	0.000522574	0.000100203	0.000100203	0.312732
LPG(18:2)	0.000240745	0.000240745	0	0	0.340893
LPG(18:1)	0.0242025	0.00480762	0.00852928	0.0020766	0.0135081
LPG(22:6)	0.00162352	0.00104184	0.000141246	0.000141246	0.18892
LPG	0.0267327	0.00632988	0.00877073	0.00214612	0.0228019
PA(34:2)	0.0301197	0.0110959	0.0133499	0.00401169	0.185653
PA(34:1)	0.0352447	0.0188995	0.0607157	0.0146363	0.31168
PA(36:2)	0.085904	0.0532342	0.0560285	0.0132013	0.597889
PA(36:1)	0.0658276	0.0513909	0.0791314	0.0267835	0.823055
PA	0.217096	0.127225	0.209225	0.057798	0.956194
PA(OH)1(34:2)	0	0	0.00543574	0.00184701	0.0147099
PA(OH)1(34:1)	0	0	0.0368633	0.0177005	0.0639164
PA(OH)1(36:3)	0	0	0.0371165	0.0177906	0.063523
PA(OH)1(36:2)	0	0	0.0612575	0.0241446	0.0295092
PA(OH)1(36:1)	0	0	0.093951	0.0291624	0.00914959
PA(OH)2(36:2)	0.00785843	0.00356704	0.0863418	0.0258526	0.0131781
PA(OH)	0.00785843	0.00356704	0.320966	0.058818	0.000340865
PA(33:1)	0	0	0.00949621	0.00388139	0.0344576
PA(35:1)	0.00173875	0.00173875	0.0532272	0.0135048	0.0035938
PA(17:1)	0.00173875	0.00173875	0.0627234	0.0150236	0.00239051
LPA(16:0)	0.00461869	0.00399326	0.0018138	0.0011854	0.515975
LPA(18:2)	0.0027399	0.0027399	0	0	0.340893
LPA(18:1)	0.00382078	0.00294382	0.00171788	0.00154359	0.541158
LPA(18:0)	0.00876168	0.00576685	0.000506393	0.000506393	0.184324
LPA	0.0199411	0.0152526	0.00403807	0.00266185	0.328568
CL(64:4)	0.00139857	0.00100759	0	0	0.195274
CL(64:3)	0.00793319	0.00304167	0.00272391	0.00130065	0.146401
CL(66:5)	0.00171705	0.00171705	0.000240391	0.000240391	0.414316
CL(66:4)	0.0716298	0.00885272	0.0288606	0.00557188	0.00218357
CL(66:3)	0.0368899	0.00428422	0.0369539	0.00193239	0.989398
CL(68:6)	0.00219242	0.00165336	0.0010622	0.000740134	0.546643
CL(68:5)	0.0785714	0.0121674	0.0414861	0.00900914	0.0342842
CL(68:4)	0.4374	0.050129	0.25526	0.0253485	0.00883264
CL(68:3)	0.0746038	0.00899988	0.104399	0.0102545	0.0538979
CL(68:2)	0.0452514	0.00609179	0.0407537	0.00759786	0.654068
CL(70:7)	0.00303307	0.00224072	0.00220345	0.00140117	0.760029
CL(70:6)	0.0573394	0.00717953	0.0419452	0.00787006	0.179034
CL(70:5)	0.348984	0.0367308	0.249879	0.033817	0.0752471
CL(70:4)	0.851656	0.081901	0.757736	0.0243575	0.297453
CL(72:8)	0.0085757	0.00559962	0.00338798	0.00164472	0.394941
CL(72:7)	0.0361484	0.00537481	0.0345395	0.00380717	0.811965
CL(72:6)	0.151012	0.0204804	0.136939	0.0168369	0.607125
CL(72:5)	0.374589	0.0330682	0.33531	0.0216209	0.343585
CL(72:4)	0.511806	0.0606891	0.522141	0.0605534	0.906435
CL	3.10073	0.233712	2.59582	0.0973942	0.0741049
CL(OH)1(68:4)	0	0	0.0892514	0.00816478	6.98783e-07
CL(OH)1(68:3)	0	0	0.026971	0.00543965	0.000571529
CL(OH)1(68:2)	0	0	0.00201435	0.00074366	0.0219827
CL(OH)1(70:6)	0	0	0.00583552	0.00280869	0.0644497
CL(OH)1(70:5)	0	0	0.0946102	0.0163766	0.000178428
CL(OH)1(70:4)	0	0	0.352989	0.0285453	2.20136e-07
CL(OH)1(70:3)	0	0	0.0260273	0.0105343	0.0330637
CL(OH)1(72:6)	0	0	0.0568928	0.0128453	0.00127594
CL(OH)1(72:5)	0	0	0.192759	0.0274215	3.58602e-05
CL(OH)1(72:4)	0	0	0.335427	0.0471113	3.21815e-05
CL(OH)1(74:7)	0	0	0.0149083	0.00510729	0.0153259
CL(OH)1(74:6)	0	0	0.0363377	0.0059466	0.000114077
CL(OH)1(74:5)	0	0	0.0143444	0.00462818	0.011263
CL(OH)2(68:4)	0	0	0.00608654	0.00219264	0.0195881
CL(OH)2(70:5)	0	0	0.00434245	0.00366601	0.263596
CL(OH)2(70:4)	0	0	0.0493322	0.00854292	0.000179043
CL(OH)2(72:5)	0	0	0.028005	0.0102983	0.0215836
CL(OH)2(72:4)	0	0	0.0672367	0.0133061	0.000496998
CL(OH)	0	0	1.40337	0.160526	5.36908e-06
CL(65:3)	0.00312516	0.00258845	0.00654508	0.0016541	0.291616
CL(67:4)	0.0190141	0.00300192	0.0644995	0.0125345	0.00545565
CL(67:3)	0.0126151	0.00306421	0.0418671	0.00196029	1.12519e-05
CL(69:6)	0.000425487	0.000425487	0.00325116	0.00194683	0.186605
CL(69:5)	0.0119283	0.00432196	0.0732265	0.01763	0.00703888
CL(69:4)	0.095002	0.00648794	0.338108	0.0391441	0.000111655
CL(69:3)	0.0118886	0.00258034	0.110261	0.0115247	8.25395e-06
CL(71:7)	0.000282432	0.000282432	0.00408042	0.00216324	0.112317
CL(71:6)	0.00427326	0.00231887	0.0449274	0.0107764	0.00419001
CL(71:5)	0.0467488	0.00553151	0.205642	0.0399538	0.00277784
CL(71:4)	0.103007	0.00754326	0.480179	0.0254817	5.9419e-08
CL(73:7)	0.00071935	0.00071935	0.017358	0.00428721	0.00333254
CL(73:6)	0.00432186	0.00209081	0.0482084	0.00721937	0.000164023
CL(73:5)	0.00446582	0.00215741	0.0327034	0.00540383	0.000668362
CL(73:4)	0.00371772	0.00178031	0.0241875	0.00232545	3.76346e-05
CL(17:1)	0.321535	0.0254111	1.49504	0.136633	7.31405e-06
SM(32:1:2)	0.00486436	0.00486436	0.00524771	0.00367818	0.951116
SM(34:2:2)	0.00660473	0.00660473	0.00777936	0.00384405	0.880897
SM(34:1:2)	0.747657	0.0854508	0.413198	0.0583689	0.00899025
SM(36:1:2)	0.0353035	0.0170235	0.023261	0.0117711	0.573546
SM(40:2:2)	0.00621705	0.00621705	0.00450299	0.00326935	0.812149
SM(40:1:2)	0.0192715	0.0126966	0.0231016	0.012853	0.836367
SM(41:2:2)	0	0	0.00245539	0.00245539	0.340893
SM(42:2:2)	0.468745	0.0743507	0.362395	0.0722576	0.329177
SM(42:1:2)	0.303254	0.0642241	0.215332	0.0292955	0.241329
SM	1.59192	0.140536	1.05727	0.179989	0.0412498
Cer(32:1:2)	0.00234305	0.00132504	0.00193832	0.000889905	0.804966
Cer(34:2:2)	0.00647696	0.00239224	0.00376795	0.00157371	0.366416
Cer(34:1:2)	0.218769	0.0305229	0.0704346	0.00307634	0.000686339
Cer(36:1:2)	0.0479201	0.00589419	0.0129774	0.00232982	0.00025697
Cer(40:2:2)	0.0169276	0.00509021	0.00354204	0.00150241	0.0302781
Cer(40:1:2)	0.0775259	0.007844	0.0233984	0.00223886	5.81372e-05
Cer(40:0:2)	0.00538634	0.00304595	0.00207865	0.0010105	0.326969
Cer(41:2:2)	0.00486247	0.00284468	0.00229367	0.00128721	0.429854
Cer(41:1:2)	0.015444	0.00545385	0.00526382	0.0014089	0.100849
Cer(42:2:2)	0.352822	0.0395861	0.121513	0.00853201	0.000195059
Cer(42:1:2)	0.239542	0.0253689	0.0995872	0.00749728	0.000352262
Cer	0.988019	0.114153	0.346795	0.0245997	0.000265049
HexCer(34:1:2)	0.0642835	0.0165855	0.0405964	0.00878882	0.235605
HexCer(40:2:2)	0.0618005	0.0144939	0.0263076	0.0125178	0.0935368
HexCer(40:1:2)	0.0673303	0.0125397	0.0262506	0.00840232	0.0215048
HexCer(41:2:2)	0.0134942	0.00684907	0.00436009	0.00436009	0.286862
HexCer(41:1:2)	0	0	0.00117374	0.00117374	0.340893
HexCer(42:2:2)	0.272922	0.0334452	0.11611	0.0187239	0.00217522
HexCer(42:1:2)	0.162171	0.0129072	0.09776	0.0212816	0.0270505
HexCer	0.642001	0.0871762	0.312558	0.0638914	0.0122921
LacCer(42:2:2)	0.0147256	0.00741	0.0218822	0.0110267	0.601884
LacCer(42:1:2)	0	0	0.00717026	0.00377004	0.0863506
LacCer	0.0147256	0.00741	0.0290525	0.0147281	0.405235
AcCar(16:0)	0.0913157	0.0205646	0.0327206	0.00792499	0.0239516
AcCar(18:1)	0.0714147	0.0208699	0.0160768	0.00349683	0.0258133
AcCar(18:0)	0.100946	0.0204676	0.0272343	0.0076801	0.00709987
AcCar_long	0.263676	0.0588919	0.0760317	0.017835	0.0122626
Class
PC	26.5215	1.20503	19.907	1.10034	0.00231067
PC(OH)	0.00221729	0.00221729	10.7232	0.797725	1.00004e-07
PC(17:1)	1.17577	0.129343	10.3408	0.742183	2.56827e-07
PC-O	9.69597	1.00673	4.09747	0.506857	0.000564112
LPC	3.43284	0.889887	1.42344	0.498992	0.0772039
LPC(OH)	0	0	0.0724615	0.0243107	0.0137925
LPC(17:1)	0	0	0.0235629	0.00593938	0.00265522
PE	12.8206	0.678969	18.0109	1.21803	0.00396217
PE(OH)	0.0566064	0.0265833	5.30309	0.857331	0.000113186
PE(17:1)	0.404216	0.0931231	2.41278	0.124769	1.47457e-07
LPE	0.822229	0.0734706	0.468932	0.044541	0.00210369
LPE-P	0.61029	0.0985303	0.149213	0.0264343	0.00110884
LPE(OH)	0	0	0.0478746	0.00941579	0.000474653
PE-P	17.533	1.16763	6.46945	0.443478	4.7739e-06
PI	9.49527	0.321934	5.1939	0.518635	3.51353e-05
PI(OH)	0	0	0.187835	0.0266754	3.53454e-05
PI(17:1)	0.0158741	0.0074593	0.682598	0.0671671	1.79902e-06
LPI	0.506298	0.0476756	0.16058	0.0228063	6.54248e-05
PS	3.49747	0.537647	2.93269	0.408552	0.422479
PS(OH)	0	0	0.104197	0.0186089	0.000227918
PS(17:1)	0	0	0.596012	0.138344	0.00154145
LPS	0.056194	0.0160702	0.0385642	0.0107335	0.383089
PG	6.18118	0.501459	2.11288	0.250222	2.72834e-05
PG(OH)	0.018415	0.00742118	0.321929	0.0444918	5.17596e-05
PG(17:1)	0.203989	0.0462603	0.576241	0.0568041	0.00047682
LPG	0.0267327	0.00632988	0.00877073	0.00214612	0.0228019
PA	0.217096	0.127225	0.209225	0.057798	0.956194
PA(OH)	0.00785843	0.00356704	0.320966	0.058818	0.000340865
PA(17:1)	0.00173875	0.00173875	0.0627234	0.0150236	0.00239051
LPA	0.0199411	0.0152526	0.00403807	0.00266185	0.328568
CL	3.10073	0.233712	2.59582	0.0973942	0.0741049
CL(OH)	0	0	1.40337	0.160526	5.36908e-06
CL(17:1)	0.321535	0.0254111	1.49504	0.136633	7.31405e-06
SM	1.59192	0.140536	1.05727	0.179989	0.0412498
Cer	0.988019	0.114153	0.346795	0.0245997	0.000265049
HexCer	0.642001	0.0871762	0.312558	0.0638914	0.0122921
LacCer	0.0147256	0.00741	0.0290525	0.0147281	0.405235
AcCar_long	0.263676	0.0588919	0.0760317	0.017835	0.0122626
GPL	89.0628	0.701088	61.5293	1.24995	3.17805e-09
GPL(OH)	0.0850971	0.0321865	18.4849	1.78927	1.23148e-06
GPL(17:1)	2.12313	0.242624	16.1898	0.932526	4.5367e-08
LGPL	5.45458	0.845824	2.2495	0.532076	0.00937241
SL	3.23666	0.141535	1.74568	0.248133	0.000390199
Data are expressed as mean ± SEM, n= 6 (independent experiments).
Student’s t-tests were performed for pairwise comparisons; significance was accepted for p < 0.05 corresponding to a false discovery rate q < 0.015. Blue fill indicates p < 0.05.
PC, phosphatidylcholine; PE, phosphatidylethanolamine; MMPE, monomethyl-PE; DMPE, dimethyl-PE; PI, phosphatidylinositol; PS, phosphatidylserine; PG, phosphatidylglycerol; PA, phosphatidic acid; CL, cardiolipin; LPC, LPE, LPI, LPS, LPA, LCL, the corresponding lyso lipids;
Sph, sphingoid base; Cer, ceramide; IPC, inositolphosphoceramide; MIPC, mannosyl-inositolphosphoceramide; DG, diacylglycerol; TG, triacylglycerol; EE, ergosteryl ester.
Sum formulas for glycero(phospho)lipids are defined as the lipid class abbreviation followed by the total number of carbons and total number of double bonds for all chains, e.g. PC(34:1).
Sum formulas for sphingolipids are defined as the lipid class abbreviation followed by the total number of carbons, total number of double bonds and total number of hydroxyl groups in the long chain base and the fatty acyl moiety, e.g. Cer(34:1:2).
(OH) and (17:1) indicate 2OHOA- and 17:1-incorporated lipid species, respectively.
